# Supplementary figures and images for: Phylogenetic Analysis Guides Transporter Protein Deorphanization: A Case Study of the SLC25 Family of Mitochondrial Metabolite Transporters
Source: MDPI journal article supplement (doi:10.3390/biom13091314), 2023-08-28

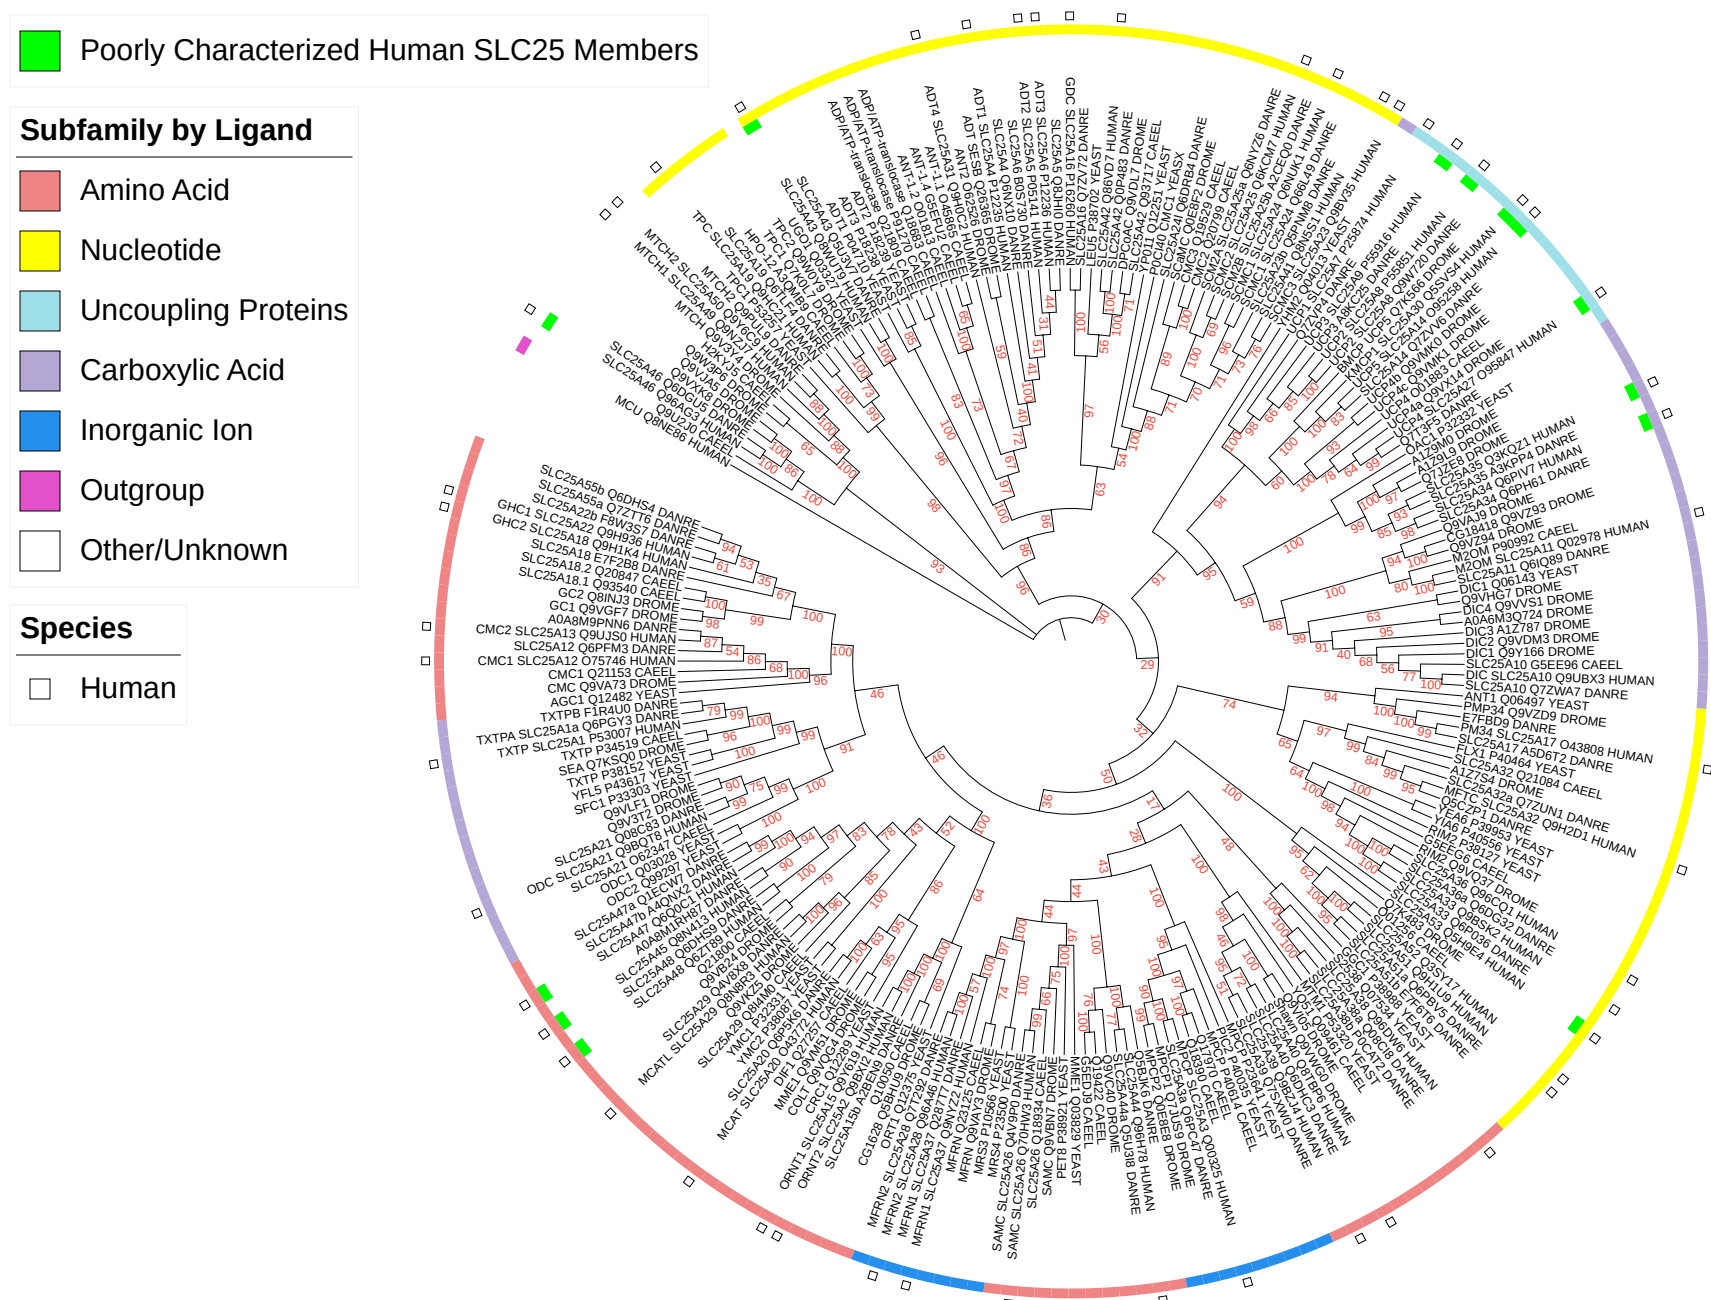

Supplement: s1 [file s1]
